# Supplementary material for: DNMT3B rs2424913 as a Risk Factor for Congenital Heart Defects in Down Syndrome
Source: MDPI journal article supplement (doi:10.3390/genes14030576), 2023-02-24
Supplement: s1 [file s1]

Table S1. Supplementary material 1. Primers and PCR-RFLP conditions for the genotyping of *DNMT*, *MTHFR* and *MTRR* genes polymorphisms with their mQTL timepoint

| Gene<br>Polymorphisms<br>(dbSNP rs)<br>Position                                                 | Forward Primer<br>Reverse Primer                                 | PCR conditions                                                                  | PCR<br>Product<br>(bp) | Restriction<br>Endonuclease<br>Enzyme | Reference | mQTL*<br>timepoint                                           |
|-------------------------------------------------------------------------------------------------|------------------------------------------------------------------|---------------------------------------------------------------------------------|------------------------|---------------------------------------|-----------|--------------------------------------------------------------|
| <b>DNMT1</b><br><b>+32204 A/G</b><br><b>rs2228611</b><br><b>exon</b><br><b>chromosome 19</b>    | 5'-GTACTGTAAGCACGGTCACCTG-3'<br>5'-TATGTTGTCCAGGCTCGTCTC-3'      | 94 °C (5 min)<br>35x: 94 °C (30s), 55 °C (30s),<br>72 °C (30s)<br>72 °C (5 min) | 261                    | BcoDI                                 | [50]      | Birth<br>Childhood<br>Adolescence<br>Middle Age<br>Pregnancy |
| <b>DNMT3A</b><br><b>-448 A/G</b><br><b>rs1550117</b><br><b>promoter</b><br><b>chromosome 2</b>  | 5'-ACACACCGCCCTCACCCCTT-3'<br>5'-TCCAGCAATCCCTGCCCA-3'           | 94 °C (5 min)<br>35x: 94 °C (30s), 55 °C (45s),<br>72 °C (30s)<br>72 °C (5 min) | 358                    | HpyCH4III                             | [51]      | -                                                            |
| <b>DNMT3B</b><br><b>-579 G/T</b><br><b>rs1569686</b><br><b>promoter</b><br><b>chromosome 20</b> | 5'-GAGGTCTCATTATGCCTAGG-3'<br>5'-GGGAGCTCACCTTCTAGAAA-3'         | 94 °C (5 min)<br>35x: 94 °C (30s), 49 °C (30s),<br>72 °C (30s)<br>72 °C (5 min) | 225                    | PvuII-HF                              | [52]      | Birth<br>Childhood<br>Adolescence<br>Middle Age<br>Pregnancy |
| <b>DNMT3B</b><br><b>-149 C/T</b><br><b>rs2424913</b><br><b>promoter</b><br><b>chromosome 20</b> | 5'-TTGTCCTGAAGCTGGCTACC-3'<br>5'-ACCAGGAGAGAAGCCAACAG-3'         | 94 °C (5 min)<br>35x: 94 °C (30s), 54 °C (30s),<br>72 °C (30s)<br>72 °C (5 min) | 431                    | AvrII                                 | [53]      | Birth<br>Childhood<br>Adolescence<br>Middle Age<br>Pregnancy |
| <b>MTHFR</b><br><b>677C&gt;T</b><br><b>rs1801133</b><br><b>exon</b><br><b>chromosome 1</b>      | 5'TGAAGGAGAAGGTGTCTGCGGGA3'<br>5'AGGACGGTGCGGTGAGAGTG3'          | 94 °C (2 min)<br>40x: 94 °C (30s), 62 °C (30s),<br>72 °C (30s)<br>72 °C (7 min) | 198                    | Hinfl                                 | [54]      | Childhood<br>Adolescence                                     |
| <b>MTHFR</b><br><b>1298A&gt;C</b><br><b>rs1801131</b><br><b>exon</b><br><b>chromosome 1</b>     | 5'CTTTGGGGAGCTGAAGGACTACTA3'<br>5'CACTTTGTGACCATTCCGGTTTG3'      | 92 °C (2 min)<br>40x: 92 °C (60s), 56 °C (60s),<br>72 °C (30s)<br>72 °C (7 min) | 163                    | Mbo II                                | [54]      | Birth<br>Childhood<br>Adolescence<br>Middle Age<br>Pregnancy |
| <b>MTRR</b><br><b>66A&gt;G</b><br><b>rs1801394</b><br><b>exon</b><br><b>chromosome 5</b>        | 5'CAGGCAAAGGCCATCGCAGAAGACAT3'<br>5'CACTTCCCAACCAAAATTCTTCAACG3' | 92 °C (2 min)<br>35x: 92 °C (60s), 56 °C (60s),<br>72 °C (90s)<br>72 °C (7 min) | 150                    | Afl III                               | [55]      | Birth<br>Childhood<br>Adolescence<br>Middle Age<br>Pregnancy |

DNMT – DNA methyltransferase; PCR – polymerase chain reaction; RFLP – restriction fragment length polymorphism; mQTL – methylation quantitative trait loci

\*derived from mQTLdb
